# Supplementary material
Source: PubMed Central journal article supplement (PMC8671326)

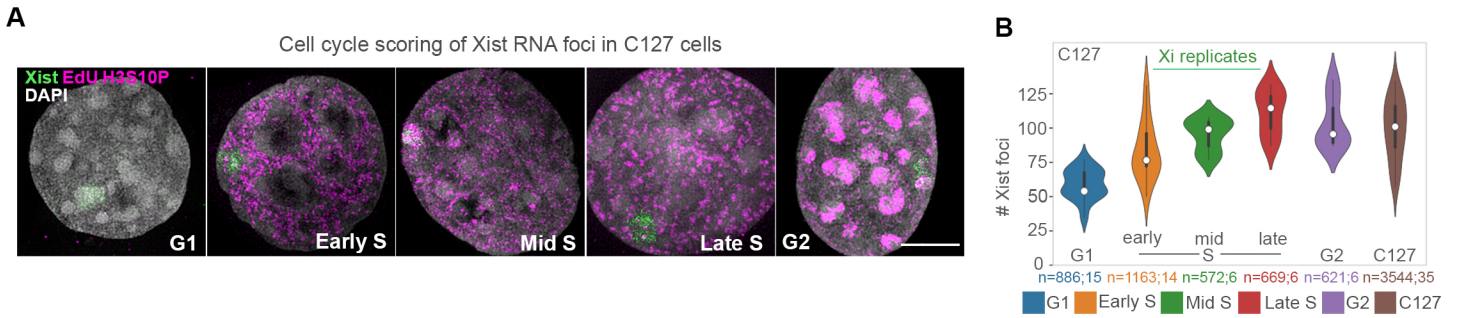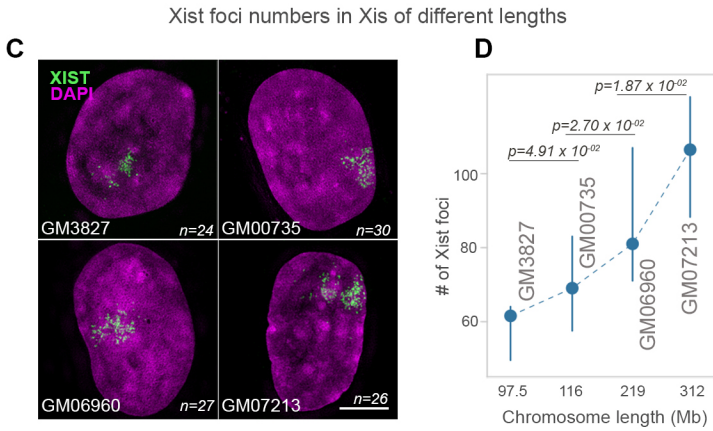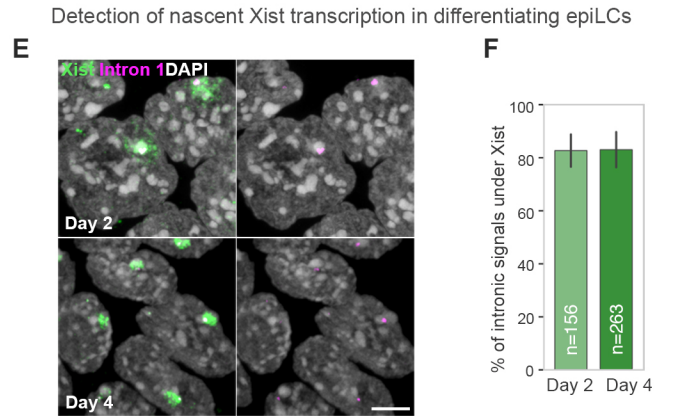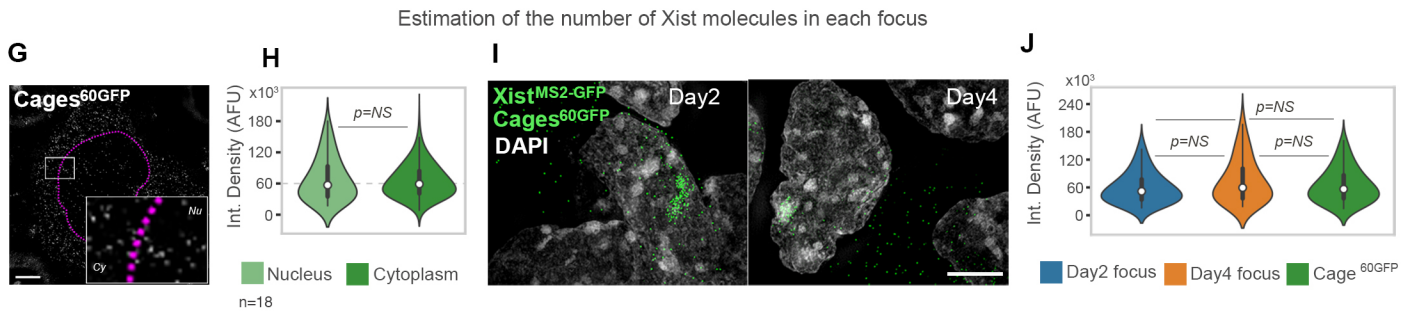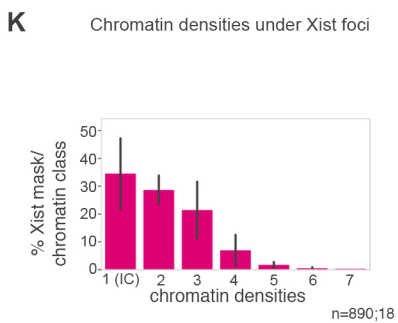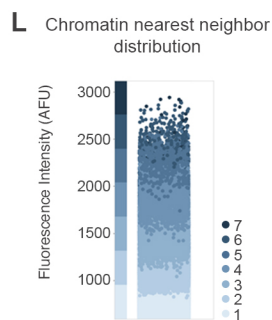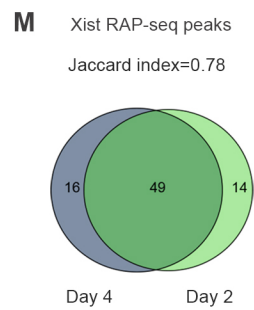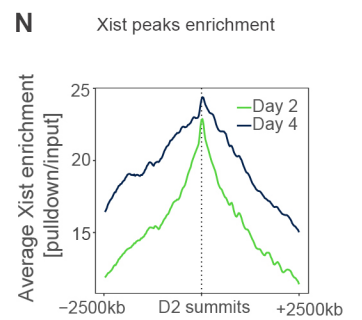

Supplement: NIHMS1755180-supplement-2.pdf [file NIHMS1755180-supplement-2.pdf]
